# Supplementary material for: Charge-assisted hydrogen bond and nitrile⋯nitrile interaction directed supramolecular associations in Cu(ii) and Mn(ii) coordination complexes: anticancer, hematotoxicity and theoretical studies
Source: Royal Society of Chemistry journal article supplement (doi:10.1039/d0nj00075b), 2020-01-01
Supplement: d0nj00075b1.pdf [file d0nj00075b1.pdf]

## Supplementary Information

### 3.1 FT-IR spectra

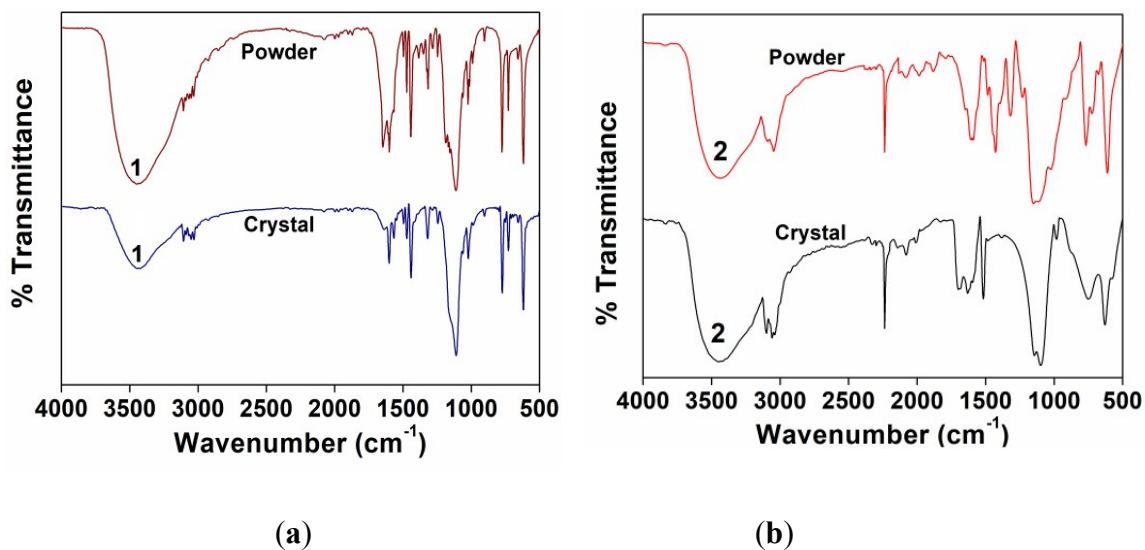

**Fig. S1** FT-IR spectra of products obtained for compounds **1(a)** and **2(b)** during reaction and crystals obtained from slow evaporation of the mother liquor.

### 3.5 Electronic spectroscopy

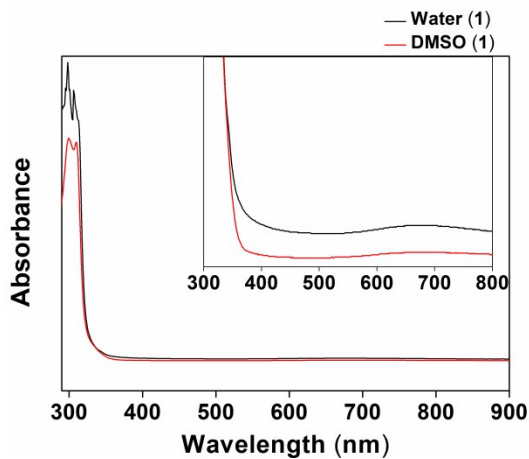

**Fig. S2** Comparison of UV-Vis spectra of **1** in water and DMSO

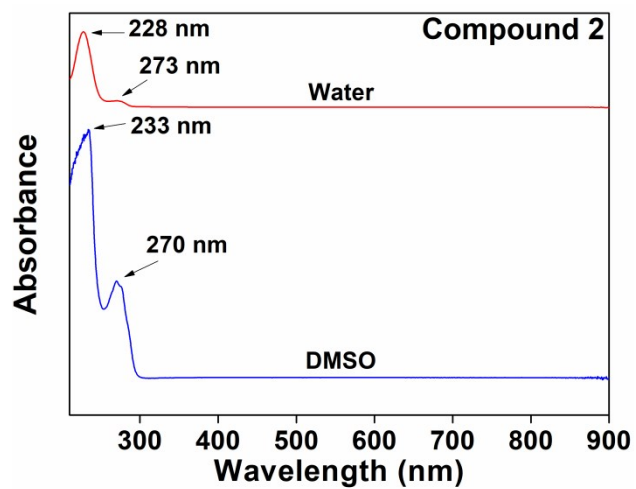

**Fig. S3** Comparison of UV-Vis spectra of **2** in water and DMSO

### 3.8 Thermogravimetric Analysis (TGA)

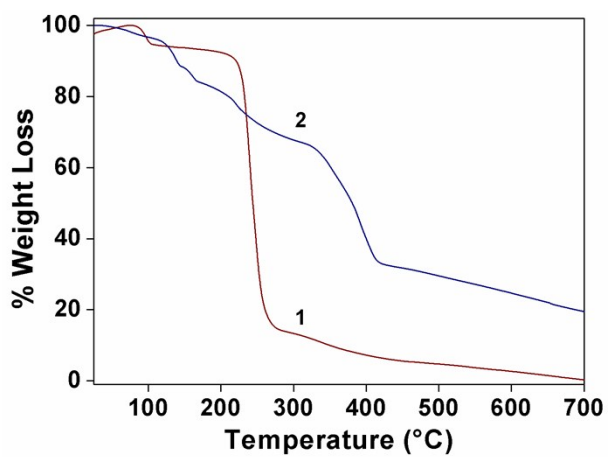

**Fig. S4** Thermogravimetric curves for compounds **1** and **2**
